# Supplementary material for: Four new lanthanide–organic frameworks: selective luminescent sensing and magnetic properties
Source: Royal Society of Chemistry journal article supplement (doi:10.1039/c6dt01393g), 2016-01-01
Supplement: c6dt01393g1.pdf [file c6dt01393g1.pdf]

*Electronic Supplementary Information*

**Four new lanthanide-organic frameworks: the selective  
luminescent sensing and magnetic properties**

**Yan Ning,<sup>a#</sup> Lu Wang,<sup>a#</sup> Guo-Ping Yang,<sup>\*a,b</sup> Yunlong Wu,<sup>a</sup> Nannan Bai,<sup>a</sup> Wenyan  
Zhang<sup>a</sup> and Yao-Yu Wang<sup>\*a</sup>**

*<sup>a</sup>Key Laboratory of Synthetic and Natural Functional Molecule Chemistry of the  
Ministry of Education, Shaanxi Key Laboratory of Physico-Inorganic Chemistry,  
College of Chemistry & Materials Science, Northwest University, Xi'an 710069,  
China. E-mail: [ygp@nwu.edu.cn](mailto:ygp@nwu.edu.cn); [wyaoyu@nwu.edu.cn](mailto:wyaoyu@nwu.edu.cn)*

*<sup>b</sup>State Key Laboratory of Coordination Chemistry, Nanjing University, P.R. China.*

*<sup>#</sup>These authors contributed equally to this work.*

**Table S1** Hydrogen bonds lengths [ $\text{\AA}$ ] and angles [ $^\circ$ ] for **1-Eu**.

| D-H $\cdots$ A             | d(D-H) | d(H $\cdots$ A) | d(D $\cdots$ A) | DHA    |
|----------------------------|--------|-----------------|-----------------|--------|
| O(8)-H(8A) $\cdots$ O(6)   | 0.820  | 1.943           | 2.763           | 179.85 |
| O(8)-H(8B) $\cdots$ O(10)  | 0.820  | 2.145           | 2.965           | 179.04 |
| O(9)-H(9B) $\cdots$ O(10)  | 0.820  | 1.949           | 2.770           | 179.57 |
| O(10)-H(10A) $\cdots$ O(5) | 0.858  | 1.971           | 2.756           | 151.68 |
| O(10)-H(10B) $\cdots$ N(1) | 0.820  | 2.126           | 2.947           | 179.37 |
| C(13)-H(13) $\cdots$ N(1)  | 0.930  | 2.542           | 3.279           | 136.42 |
| C(16)-H(16C) $\cdots$ O(2) | 0.960  | 2.530           | 3.422           | 154.73 |

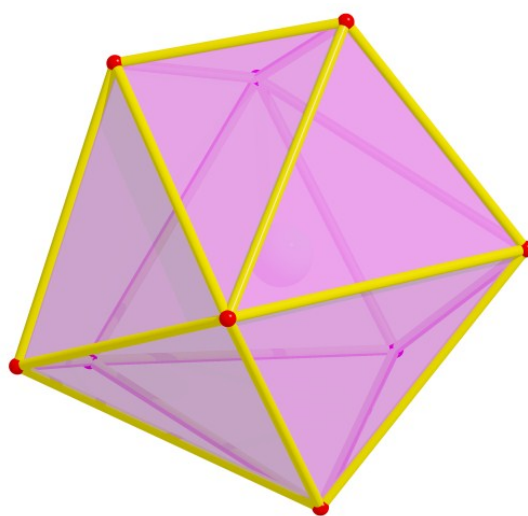

**Fig. S1** Coordination arrangement of  $\text{Eu}^{3+}$  centers could be described as a distorted dodecahedron.

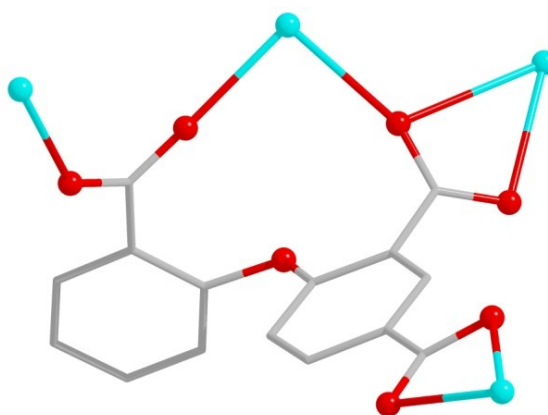

**Fig. S2** The three carboxylates of  $\text{L}^{3+}$  ligands take coordination with  $\text{Eu}^{3+}$  ions.

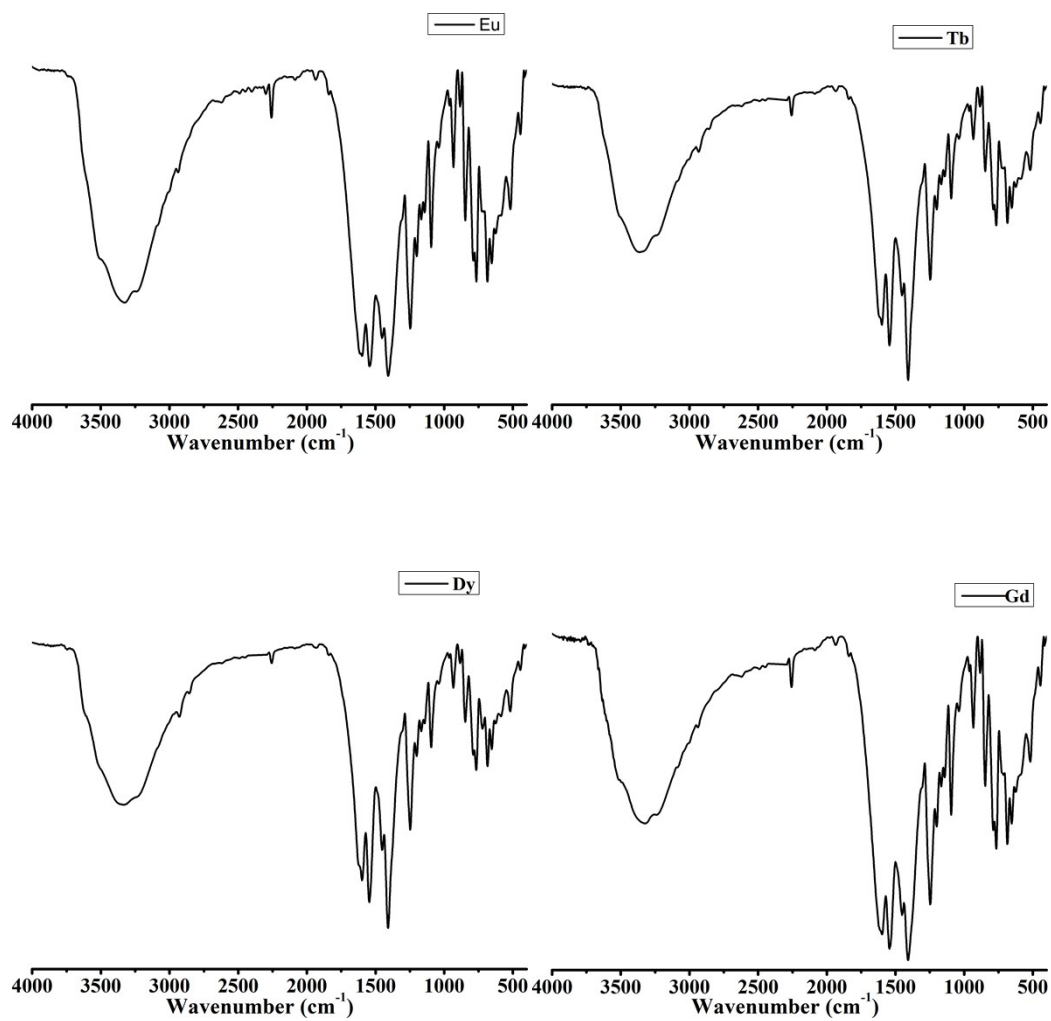

Fig. S3 The FT-IR spectrometer of 1-Eu, 1-Tb, 1-Dy and 1-Gd.

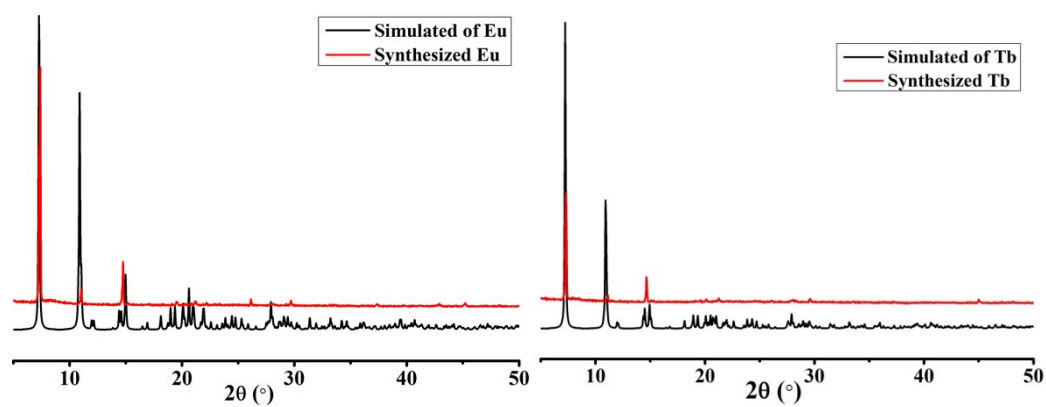

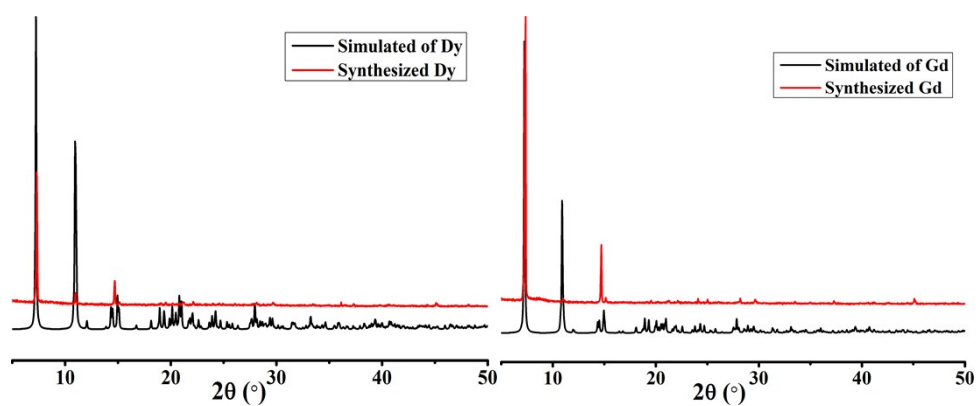

**Fig. S4** PXRD patterns of **1-Eu**, **1-Tb**, **1-Dy** and **1-Gd** simulated from the X-ray single-crystal structure and as-synthesized samples of **1-Eu**, **1-Tb**, **1-Dy** and **1-Gd**.

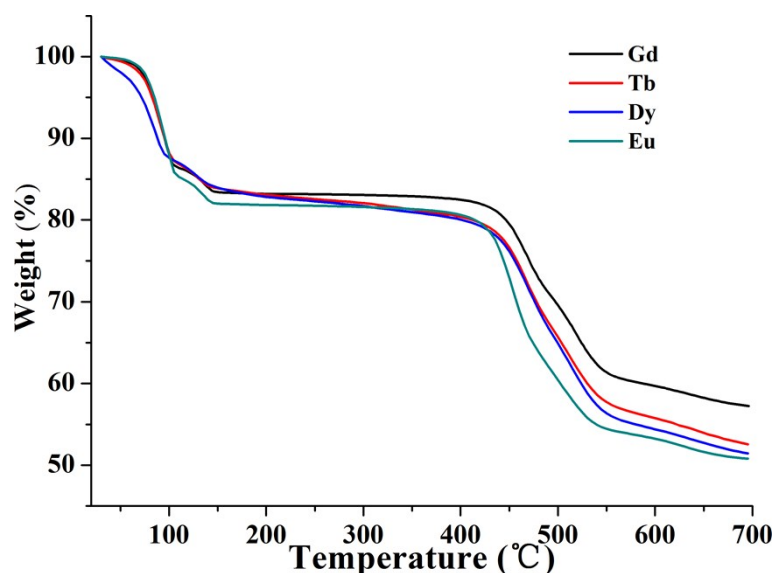

**Fig.S5**The TGA plots of four compounds under  $N_2$  environment. For **1-Tb**, the first major weight loss of 16.54% from 29 to 144°C, corresponding to two coordinated water, one guest water and one acetonitrile molecules per formula unit (calca.17.17%), the major framework can keep stable to 409°C; For **1-Dy**, the first major weight loss of 16.26% from 29 to 152°C, ascribing to two coordinated water, one guest water and one acetonitrile molecules per formula unit (calca.17.06%), the major framework can keep stable to 409°C; For **1-Gd**, the first major weight loss of 16.69% from 29 to 143°C, corresponding to two coordinated water, one guest water and one acetonitrile molecules per formula unit (calca.17.22%), the major framework can keep stable to 421°C.

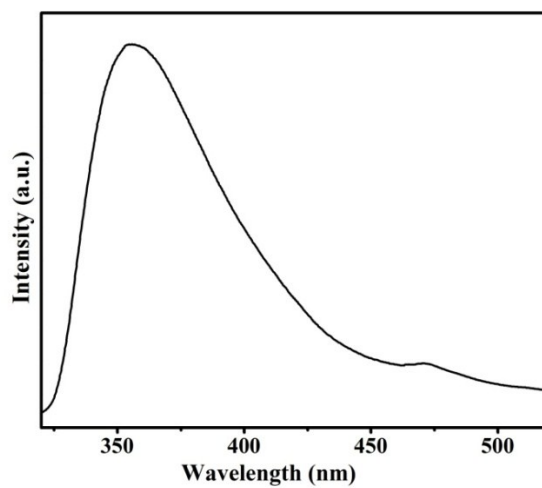

Fig. S6 The emission spectra of H<sub>3</sub>L

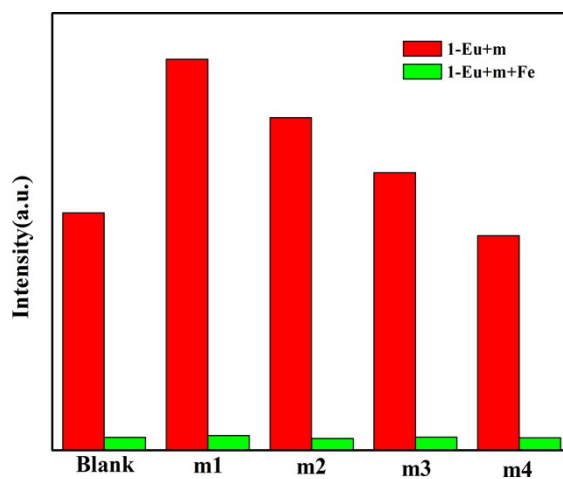

(a)

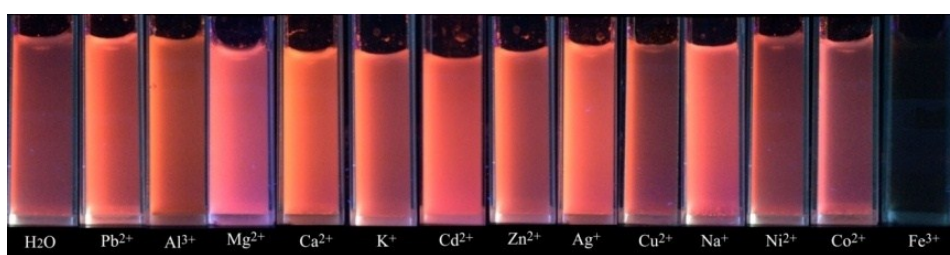

(b)

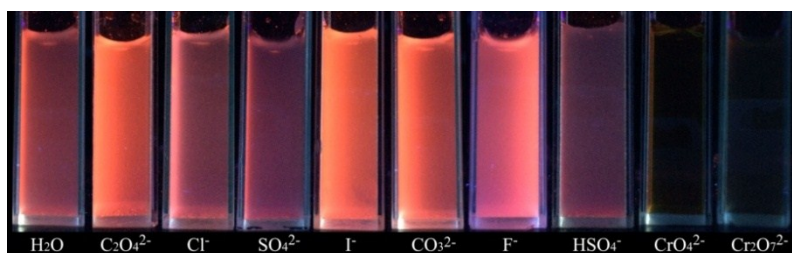

(c)

**Fig. S7**(a) Luminescence intensity at 617 nm of **1-Eu** dispersed in water with addition of different mixed ions ( $10^{-1}$ M) mixed solution added  $\text{Fe}^{3+}$  ions ( $10^{-1}$  M) (m1:  $\text{Cu}^{2+}/\text{Al}^{3+}/\text{Pb}^{2+}$ ; m2:  $\text{Zn}^{2+}/\text{Cd}^{2+}/\text{Ag}^{+}$ ; m3:  $\text{K}^{+}/\text{Mg}^{2+}$ ; m4:  $\text{Na}^{+}/\text{Ca}^{2+}/\text{Co}^{2+}$ ). (b) Pictures of different  $\text{M}^{n+}@1\text{-Eu}$  solutions ( $\text{M} = \text{Pb}^{2+}, \text{Al}^{3+}, \text{Mg}^{2+}, \text{Ca}^{2+}, \text{K}^{+}, \text{Cd}^{2+}, \text{Zn}^{2+}, \text{Ag}^{+}, \text{Cu}^{2+}, \text{Na}^{+}, \text{Ni}^{2+}, \text{Co}^{2+}$ , and  $\text{Fe}^{3+}$ , respectively). (c) Pictures of different  $1\text{-Eu}@A^x$  solutions ( $A = \text{C}_2\text{O}_4^{2-}, \text{Cl}^{-}, \text{SO}_4^{2-}, \text{I}^{-}, \text{CO}_3^{2-}, \text{F}^{-}, \text{HSO}_4^{-}, \text{CrO}_4^{2-}$  and  $\text{Cr}_2\text{O}_7^{2-}$ , respectively).

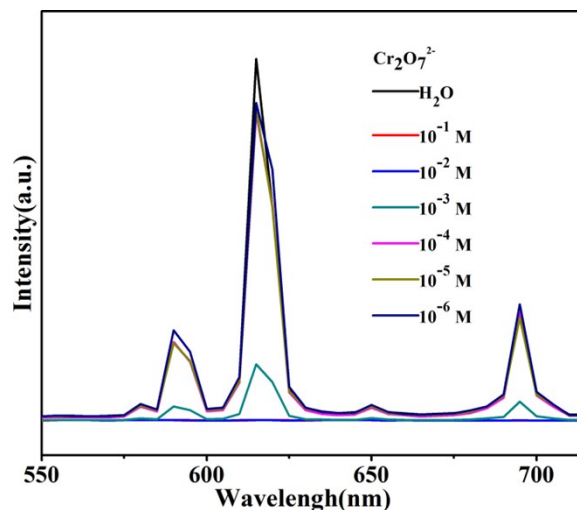

(a)

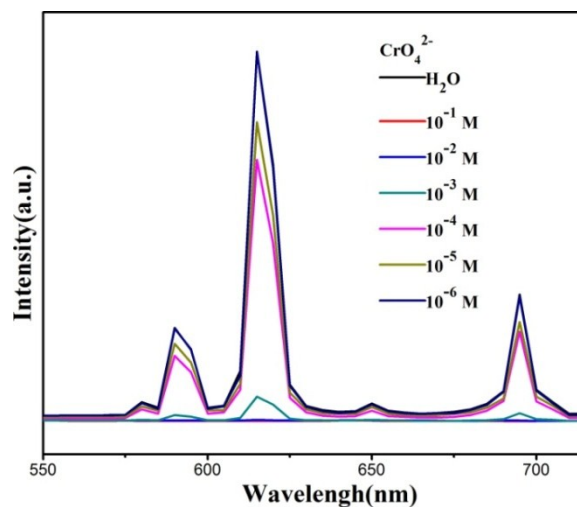

(b)

**Fig.S8** Luminescent spectra of **1-Eu** in aqueous solution with  $\text{Cr}_2\text{O}_7^{2-}$  (a) and  $\text{CrO}_4^{2-}$  (b) ions at different concentration (ca.  $10^{-6}$ - $10^{-1}$ M).

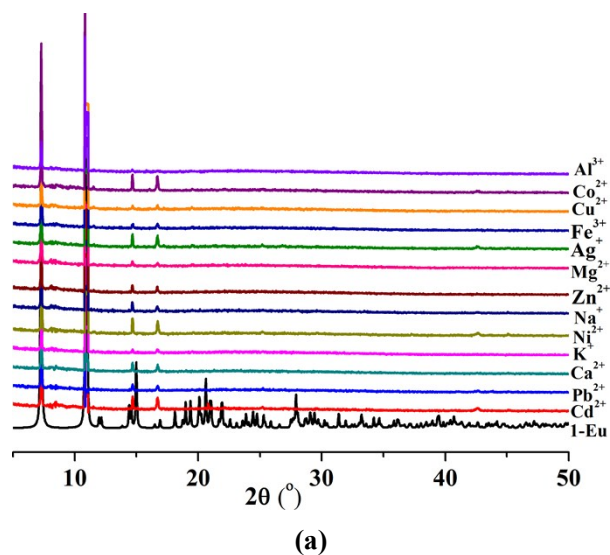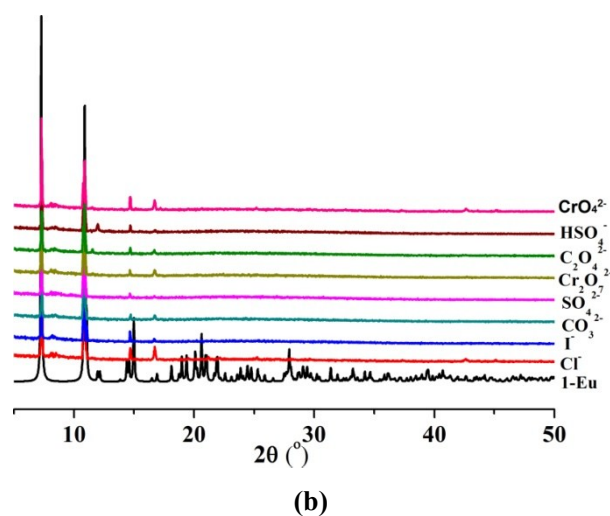

**Fig. S9**(a) The XRD patterns of **1-Eu** treated by different  $M(\text{NO}_3)_x$  ( $M = \text{Na}^+, \text{K}^+, \text{Mg}^{2+}, \text{Ag}^+, \text{Ca}^{2+}, \text{Cd}^{2+}, \text{Zn}^{2+}, \text{Co}^{2+}, \text{Cu}^{2+}, \text{Al}^{3+}, \text{Ni}^{2+}, \text{Fe}^{3+}$  and  $\text{Pb}^{2+}$ ) aqueous solutions. (b) The XRD patterns of **1-Eu** treated by different  $\text{K}_x(\text{A})$  ( $\text{A} = \text{F}^-, \text{Cl}^-, \text{I}^-, \text{C}_2\text{O}_4^{2-}, \text{CO}_3^{2-}, \text{Cr}_2\text{O}_7^{2-}, \text{SO}_4^{2-}, \text{HSO}_4^-$  and  $\text{CrO}_4^{2-}$ ) aqueous solutions.

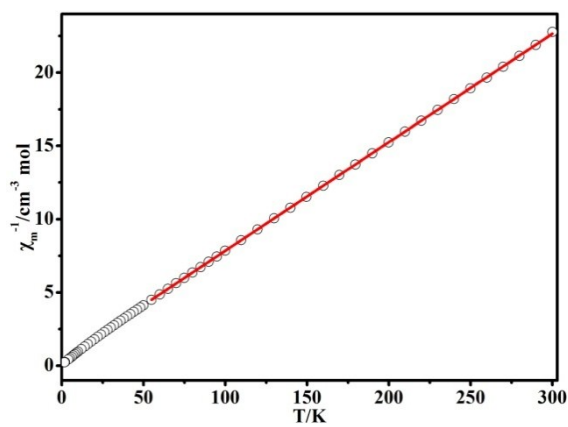

**Fig. S10** The inverse magnetic susceptibility data ( $\chi_M^{-1}$ ) of **1-Dy**.
